# Supplementary material for: The Complex Transcriptional Landscape of Magnetosome Gene Clusters in Magnetospirillum gryphiswaldense
Source: PubMed Central journal article supplement (PMC8547445; doi:10.1128/msystems.00893-21), 2021-09-14
Supplement: msystems.00893-21-st001.pdf [file msystems.00893-21-st001.pdf]

**Table S1 Oligonucleotides used in this work. The restriction enzymes are underlined, optRBS is highlighted in red.**

| Primer name                                | Sequence 5' - 3'                                                   | Restriction enzyme |
|--------------------------------------------|--------------------------------------------------------------------|--------------------|
| <b>Bioluminescence reporter experiment</b> |                                                                    |                    |
| Xhol-PfeoAB1 fw                            | GGG <u>CTCGAG</u> GTGCCGAGGGAAACATCTG                              | XhoI               |
| NdeI-PfeoAB1 rev                           | CCCCATATGCCTGGAACCTCCTTATTTGTTAATG                                 | NdeI               |
| Xhol-Pmms6 fw                              | GGG <u>CTCGAG</u> ACCTGTCAATTCCTTCCTG                              | XhoI               |
| NdeI-Pmms6 rev                             | GGGCATATGCAGAGTTCTCCTTAGCAATC                                      | NdeI               |
| Xhol-Pmms36 fw                             | GGG <u>CTCGAG</u> GGTTCGGCCTCGGGTGATTACG                           | XhoI               |
| NdeI-Pmms36 rev                            | CCCCATATGTGGCTCCGCTTCCGCTAGCTGCGCGG                                | NdeI               |
| Xhol-PmamG fw                              | GGA <u>CTCGAG</u> CAACTTTTTCGCTTACTAG                              | XhoI               |
| NdeI-PmamG rev                             | CCCCATATGCTGATCTCCGGCAAGTG                                         | NdeI               |
| Xhol-PmamH fw                              | AA <u>CTCGAG</u> GGCATCCTGATCGGTAGGCG                              | XhoI               |
| NdeI-PmamH rev                             | GGGCATATGTCCCGTCAACAATTCACCTCC                                     | NdeI               |
| Xhol-P(mamH) fw                            | GGG <u>CTCGAG</u> GTTCCAGATTGGTGGGTTTTATTTG                        | NdeI               |
| NdeI-optRBS-P(mamH) rev                    | GGGCATATGCTGAT <u>TCTCCT</u> AAACGTTCTCCAGTCTTG                    | XhoI               |
| NdeI-natRBS-P(mamH) rev                    | CCCCATATGAAACGTTCTCCAGTCTTGATACAG                                  | NdeI               |
| Xhol-P(mamE) for                           | GGG <u>CTCGAG</u> GTTTCGCCAATCCCACCACTC                            | NdeI               |
| NdeI-optRBS-P(mamE) rev                    | CCCCATATGCTGAT <u>TCTCCT</u> CGTCTTTACGGTGACGTAC                   | NdeI               |
| NdeI-natRBS-P(mamE) rev                    | CCCCATATGTATCCCGCTCCACCCTCAAAG                                     | NdeI               |
| Xhol-P(mamL1) for                          | GGG <u>CTCGAG</u> ATGGGGGATGCATTTTGGTTG                            | XhoI               |
| NdeI-optRBS-P(mamL1) rev                   | GTT <u>CATATG</u> CTGAT <u>TCTCCT</u> GGCGTTGGACGATGCC             | NdeI               |
| P(mamL2) fw                                | TCGTTGGTGTTCGGCGGCTTGAT                                            | -                  |
| optRBS-P(mamL2) rev                        | CTGAT <u>TCTCCT</u> TATGCTTGCGCCGTTTCATAAC                         | -                  |
| NdeI-natRBS-P(mamL2) rev                   | CCCCATATGCCTTACCTACTCCAAAGCC                                       | NdeI               |
| Xhol-P(mamO) fw                            | GGG <u>CTCGAG</u> CGGATCAGTCTGCAGAACGCC                            | XhoI               |
| NdeI-optRBS-P(mamO) rev                    | CCCCATATGCTGAT <u>TCTCCT</u> TCCCGGCTAATCCCAAACC                   | NdeI               |
| NdeI-natRBS-P(mamO) rev                    | CCCCATATGTCCCGGCTAATCCCAAACC                                       | NdeI               |
| Xhol-P(mamP) fw                            | GTT <u>CTCGAG</u> GCACCCCGGTCTTGCGC                                | XhoI               |
| NdeI-optRBS-P(mamP) rev                    | CCCCATATGCTGAT <u>TCTCCT</u> AAATCCCAATCCGGTGGCTC                  | NdeI               |
| NdeI-natRBS-P(mamP) rev                    | CCCCATATGACTGTTCTCCAAAATCCCAATCCG                                  | NdeI               |
| Xhol-P(mamA) fw                            | GGG <u>CTCGAG</u> GTGATAAATTAGCCAGAGCCACC                          | XhoI               |
| NdeI-optRBS-P(mamA) rev                    | CCCCATATGCTGAT <u>TCTCCT</u> ATTCGCACCGAGCTTCTTC                   | NdeI               |
| Xhol-P(mamQ) fw                            | GTGCTCGAGATGATGACCTCGCTGGTGGATATG                                  | XhoI               |
| NdeI-optRBS-P(mamQ) rev                    | CCCCATATGCTGAT <u>TCTCCT</u> AATGATCGGCGTGTCGC                     | NdeI               |
| NdeI-natRBS-P(mamQ) rev                    | CCCCATATGTGCTGTCCAAATCAATTCTTGATTCC                                | NdeI               |
| Xhol-PmamY fw                              | GGG <u>CTCGAG</u> GGCAGCCTCATTTAAAC                                | XhoI               |
| NdeI-PmamY rev                             | CCCCATATGAAGGGCTGCTCCCGTGGTGGCTGTGG                                | NdeI               |
| Xhol-PmamX fw                              | GGG <u>CTCGAG</u> CGAAAGCCGACGTCCGAAATTG                           | XhoI               |
| NdeI-optRBS2-PmamX rev                     | CCCCATATGCTGAT <u>TCTCCT</u> GATCCAGACGGCGATGTC                    | NdeI               |
| NdeI-natRBS-PmamX rev                      | CCCCATATGGATCCAGACGGCGATGTCGGGATGTG                                | NdeI               |
| Control + string                           | GGG <u>CTCGAG</u> GAAAGAAGCTCGGTGCGACT <u>AGGAGA</u> TCAGCATATGGGG | XhoI, NdeI         |
| Control - string                           | CCCCATATGCTGAT <u>TCTCCT</u> AGTTCGCACCGAGCTTCTCCTCGAGCCC          | XhoI, NdeI         |
| <b>Promoter sequence substitution</b>      |                                                                    |                    |
| Pmms6_LHR fw                               | GCGATGGCCAGATACAGAACCAGGACCTG                                      | -                  |

|                    |                                           |       |
|--------------------|-------------------------------------------|-------|
| Pmms6_LHR_PFS rev  | GAATGGATGCGAGTAATGGTGCCTGCTCAGATCGCC      | -     |
| Pmms6_LHR_PFS fw   | GGCGATCTGAGCAGGCACCATTACTCGCATCCATTC      | -     |
| Pmms6_PFS_RHR rev  | TAGTGTTTTTAGCCCCATCGATTGAGGACCTTCAGTG     | -     |
| Pmms6_PFS_RHR fw   | CACTGAAGGTCCTCAATCGATGGGGCTAAAAAACTA      | -     |
| Pmms6_RHR rev      | GATGCAGCGCGAACATGGCCAGGATG                | -     |
| Pmms36_LHR fw      | GCGACATGAAAATCAACAGGACGATCAGGCGT          | -     |
| Pmms36_LHR-PFS rev | GAATGGATGCGAGTAATGGGAAGCGGAGCCAATGG       | -     |
| Pmms36_LHR-PFS fw  | CCATTGGCTCCGCTTCCCATTACTCGCATCCATTC       | -     |
| Pmms36_PFS-RHR rev | CATCAGCTGTTTCAGGACCGATTGAGGACCTTCAGTGC    | -     |
| Pmms36_PFS-RHR fw  | GCACTGAAGGTCCTCAATCGGTCTGAAACAGCTGATG     | -     |
| Pmms36_RHR rev     | CTTCGCTGTGTCCACAAGAACC GCGAC              | -     |
| PmamH_LHR fw       | CCTTCAATTACGGTTTCCACGGTCTCGGC             | -     |
| PmamH_LHR_PFS rev  | GAGAATGGATGCGAGTAATGTTAGCGCGCTAGCACATTTTC | -     |
| PmamH_LHR_PFS fw   | GAAATGTGCTAGCGCGCTAACATTACTCGCATCCATTCTC  | -     |
| PmamH_PFS_RHR rev  | CAGGTTCCATTCCCGTCACCGATTGAGGAGCTTGAGTG    | -     |
| PmamH_PFS_RHR fw   | CACTCAAGCTCCTCAATCGGTGACGGGAATGGAACCTG    | -     |
| PmamH_RHR rev      | GCCGAGAACAGAACCGAGCAAGTCTTTTGGTGC         | -     |
| PmamY_LHR fw       | CAAGGCCCACTCGCCATCCTCGAAG                 | -     |
| PmamY_LHR-PFS rev  | GAGAATGGATGCGAGTAATGGCCCTTATGTTGATGAAC    | -     |
| PmamY_LHR-PFS fw   | GTTTCATCAACATAAGGGCCATTACTCGCATCCATTCTC   | -     |
| PmamY_PFS-RHR rev  | CCTCACAACAAAAGGCGCGATTGAGGACCTTCAGTG      | -     |
| PmamY_PFS-RHR fw   | CACTGAAGGTCCTCAATCGCCGCTTTTGTGTTGTGAGG    | -     |
| PmamY_RHR rev      | CACTCCCTGCTGATTTCTGGGAATAGCTC             | -     |
| PmamX_LHR fw       | CGAACCATCCCACGCAGACGATGGAG                | -     |
| PmamX_LHR-PFS rev  | GAATGGATGCGAGTAATGTGAACACCAAAGCCGTTG      | -     |
| PmamX_LHR-PFS fw   | CAACGGCTTTGGTGTTCACATTACTCGCATCCATTC      | -     |
| PmamX_PFS-RHR rev  | GTCCAGACGGAAGGCCGACGATTGAGGACCTTCAG       | -     |
| PmamX_PFS-RHR fw   | CTGAAGTCCTCAATCGTCGGCCTTCCGTCTGGAC        | -     |
| PmamX_RHR rev      | GATCTTCATGCTCTCGCAGATTGTGAGAACCCTC        | -     |
| XhoI-Pmms6 fw      | GAGCTCGAGACCTGTCAATTCCTCCCTG              | XhoI  |
| BamHI-mmsF rev     | CACGGATCCTCAGATCCGGTCCGCCAC               | BamHI |
| PacI-Pmms36 fw     | GGGTTAATTAAGGTTCCGGCCTCGGGTGATTAC         | PacI  |
| BamHI-mms48 rev    | CACGGATCCTCATGTACTGCGGAACAGTCCG           | BamHI |
| XhoI-PmamH fw      | GAGCTCGAGGTGTGCCACATTGCCAGG               | XhoI  |
| BamHI-mamH rev     | CACGGATCCTTAGGCCACTTCGTCATC               | BamHI |
| XhoI-PmamY fw      | GGGCTCGAGATTATACTATTCCGAAATTAATAC         | XhoI  |
| SacI-mamY rev      | GTTGAGCTCTCACGCATCGGAGATGG                | SacI  |
| XhoI-PmamX fw      | GAACTCGAGCGAAAGCCGACGTCCGAAA              | XhoI  |
| SacI-ftsZ rev      | GTTGAGCTCTCAGGCGATACCGGTGG                | SacI  |
