# Supplementary material for: The Complex Transcriptional Landscape of Magnetosome Gene Clusters in Magnetospirillum gryphiswaldense
Source: PubMed Central journal article supplement (PMC8547445; doi:10.1128/msystems.00893-21), 2021-09-14
Supplement: msystems.00893-21-st002.pdf [file msystems.00893-21-st002.pdf]

**Table S2: The full set of TSS found in the major MagOPs. The TSS supported by both Cappable-seq and WTSS were selected for bioluminescence analysis by manual curation.**

| TSS start        | Strand | Classification | RRS   | Capseq_score | Selected for the bioluminescence analysis after manual curation (TSS No./Putative promoter) |
|------------------|--------|----------------|-------|--------------|---------------------------------------------------------------------------------------------|
| <i>feoAB1op</i>  |        |                |       |              |                                                                                             |
| 269852           | Fwd    | pTSS           | 112   | 2.5          | 1/P <sub>feoA1</sub>                                                                        |
| 269894           | Fwd    | pTSS           | 19    | 1.5          |                                                                                             |
| 270478           | Fwd    | iTSS           | 129   | 4.3          |                                                                                             |
| 270748           | Fwd    | iTSS           | 18    | 1.5          |                                                                                             |
| 271180           | Rev    | asTSS          | 27    | 2.0          |                                                                                             |
| <i>mms6op</i>    |        |                |       |              |                                                                                             |
| 307433           | Rev    | pTSS           | 1270  | 3.1          | 2/P <sub>mms36</sub>                                                                        |
| 307467           | Rev    | oTSS           | 112   | 1.5          |                                                                                             |
| 307629           | Rev    | iTSS           | 575   | 2.9          |                                                                                             |
| 308388           | Rev    | pTSS           | 54    | 3.0          |                                                                                             |
| 308415           | Fwd    | asTSS          | 15    | 1.2          |                                                                                             |
| 308433           | Rev    | pTSS           | 20    | 1.6          |                                                                                             |
| 308678           | Rev    | oTSS           | 188   | 2.8          | 3/P <sub>mms6</sub>                                                                         |
| 308808           | Rev    | oTSS           | 41    | 1.1          |                                                                                             |
| <i>mamGFDCop</i> |        |                |       |              |                                                                                             |
| 308983           | Fwd    | pTSS           | 27    | 2.0          | 4/P <sub>mamG</sub>                                                                         |
| 309202           | Fwd    | iTSS           | 31    | 2.2          |                                                                                             |
| 309668           | Rev    | asTSS          | 39    | 2.6          |                                                                                             |
| 309820           | Rev    | asTSS          | 28    | 2.1          |                                                                                             |
| 310191           | Fwd    | iTSS           | 24    | 1.9          |                                                                                             |
| <i>mamABop</i>   |        |                |       |              |                                                                                             |
| 321356           | Fwd    | pTSS           | 269   | 1.1          | 5/P <sub>mamH</sub>                                                                         |
| 321463           | Fwd    | iTSS           | 36    | 2.5          |                                                                                             |
| 322571           | Rev    | asTSS          | 190   | 1.9          |                                                                                             |
| 322593           | Fwd    | iTSS           | 11352 | 1.4          | 6/P <sub>(mamH)</sub>                                                                       |
| 323000           | Fwd    | iTSS           | 19    | 1.5          |                                                                                             |
| 323482           | Fwd    | iTSS           | 24    | 1.9          | 7/P <sub>(mamE)</sub>                                                                       |
| 323846           | Rev    | asTSS          | 39    | 1.6          |                                                                                             |
| 325254           | Fwd    | iTSS           | 256   | 1.0          |                                                                                             |
| 326474           | Fwd    | iTSS           | 318   | 1.2          |                                                                                             |
| 326530           | Fwd    | pTSS           | 18    | 1.5          |                                                                                             |
| 327029           | Rev    | asTSS          | 15    | 1.2          |                                                                                             |
| 327354           | Rev    | asTSS          | 20    | 1.6          |                                                                                             |
| 327686           | Fwd    | iTSS           | 303   | 2.5          | 8/P <sub>(mamL1)</sub>                                                                      |
| 327876           | Fwd    | iTSS           | 94    | 1.0          | 9/P <sub>(mamL2)</sub>                                                                      |
| 327962           | Fwd    | iTSS           | 18    | 1.5          |                                                                                             |
| 328474           | Rev    | asTSS          | 19    | 1.5          |                                                                                             |
| 328970           | Fwd    | iTSS           | 15    | 1.2          |                                                                                             |
| 329292           | Fwd    | iTSS           | 21    | 1.7          |                                                                                             |
| 329329           | Rev    | asTSS          | 85    | 3.7          |                                                                                             |
| 329434           | Fwd    | iTSS           | 59    | 1.6          |                                                                                             |
| 329767           | Fwd    | iTSS           | 293   | 1.2          |                                                                                             |

|                |     |       |      |     |                        |
|----------------|-----|-------|------|-----|------------------------|
| 329802         | Fwd | iTSS  | 17   | 1.4 |                        |
| 330355         | Rev | asTSS | 23   | 1.8 |                        |
| 330492         | Rev | asTSS | 16   | 1.3 |                        |
| 330974         | Rev | asTSS | 30   | 2.2 |                        |
| 331477         | Rev | asTSS | 17   | 1.4 |                        |
| 331685         | Fwd | iTSS  | 24   | 1.9 |                        |
| 332122         | Fwd | iTSS  | 1309 | 1.5 | 10/P <sub>(mamO)</sub> |
| 332212         | Fwd | iTSS  | 20   | 1.6 |                        |
| 333007         | Fwd | pTSS  | 73   | 2.5 | 11/P <sub>(mamP)</sub> |
| 333061         | Rev | asTSS | 69   | 3.4 |                        |
| 333093         | Fwd | iTSS  | 100  | 3.9 | 12/P <sub>(mamA)</sub> |
| 333317         | Fwd | iTSS  | 27   | 2.0 |                        |
| 333526         | Fwd | iTSS  | 94   | 3.8 |                        |
| 333786         | Rev | asTSS | 63   | 3.3 |                        |
| 333959         | Fwd | iTSS  | 92   | 3.8 |                        |
| 334067         | Fwd | iTSS  | 85   | 1.7 |                        |
| 334074         | Rev | asTSS | 22   | 1.7 |                        |
| 334094         | Rev | asTSS | 18   | 1.5 |                        |
| 334435         | Fwd | iTSS  | 682  | 1.7 | 13/P <sub>(mamQ)</sub> |
| 335193         | Rev | asTSS | 33   | 2.3 |                        |
| 336749         | Rev | asTSS | 30   | 2.2 |                        |
| 336981         | Fwd | pTSS  | 32   | 1.3 |                        |
| 337051         | Fwd | iTSS  | 66   | 3.3 |                        |
| <i>mamXYop</i> |     |       |      |     |                        |
| 366353         | Rev | iTSS  | 19   | 1.5 |                        |
| 366668         | Fwd | asTSS | 17   | 1.4 |                        |
| 366991         | Rev | iTSS  | 28   | 2.1 |                        |
| 367249         | Rev | iTSS  | 59   | 3.2 |                        |
| 367495         | Fwd | asTSS | 22   | 1.7 |                        |
| 367833         | Rev | iTSS  | 21   | 1.7 |                        |
| 368342         | Fwd | asTSS | 17   | 1.4 |                        |
| 368801         | Rev | iTSS  | 39   | 2.6 |                        |
| 369110         | Rev | iTSS  | 144  | 4.5 |                        |
| 369133         | Fwd | asTSS | 243  | 4.2 |                        |
| 369729         | Rev | pTSS  | 315  | 2.1 | 14/P <sub>mamX</sub>   |
| 370214         | Fwd | asTSS | 120  | 1.9 |                        |
| 370996         | Rev | pTSS  | 15   | 1.2 | 15/P <sub>mamY</sub>   |
| 371007         | Rev | pTSS  | 368  | 3.0 | 16/P <sub>mamY</sub>   |
| 371052         | Rev | pTSS  | 586  | 2.6 |                        |
