# Supplementary material for: The Complex Transcriptional Landscape of Magnetosome Gene Clusters in Magnetospirillum gryphiswaldense
Source: PubMed Central journal article supplement (PMC8547445; doi:10.1128/msystems.00893-21), 2021-09-14
Supplement: msystems.00893-21-st003.pdf [file msystems.00893-21-st003.pdf]

Table S3 Characteristics of the promoters tested in this study. For each promoter, RLUmax values measured with optRBS ans natRBS are shown in three representative clones.

| Promoter                   | Fragment sequence 5'-3'                                                                                                                                                                                                                                                                                                                                    | Fragment length, bp | Position to predicted TSS | Promoter type by position in the operon | Activity, maximal emitted light (RLUmax), with native RBS |                        |                        | Activity, maximal emitted light (RLUmax), with optRBS |                        |                       |
|----------------------------|------------------------------------------------------------------------------------------------------------------------------------------------------------------------------------------------------------------------------------------------------------------------------------------------------------------------------------------------------------|---------------------|---------------------------|-----------------------------------------|-----------------------------------------------------------|------------------------|------------------------|-------------------------------------------------------|------------------------|-----------------------|
|                            |                                                                                                                                                                                                                                                                                                                                                            |                     |                           |                                         | Clone 1                                                   | Clone 2                | Clone 3                | Clone 1                                               | Clone 2                | Clone 3               |
| <i>P(mamH)*</i>            | GGCATCCTGATCGGTAGCGGATGGCGCAAAGATGTGACGTC<br>TTGTTTCGAGCAGATGCGCGAAATGTGCTAGCGCGCTAAGT<br>GTGCCACATTGCGAGGTTCTCTCGTATGAACCCAGTTTTTAT<br>GGCTTGTCAACCCGACCTCGATTGCTATAGTCCGTGCGA<br>ATTGGAGGTGAATTGTGACGGGA                                                                                                                                                 | 189                 | +165 -23                  | primary                                 | 23,270.05 ± 9,077.89                                      | 10,467.74 ± 1,684.37   | 13,395.54 ± 3,325.41   | ND                                                    | ND                     | ND                    |
| <i>P(mamH)</i>             | GTTGAGATTGGTGGGTTTTTATTGATTACATTGGCCCTCTG<br>CGCCTTTTATCTTTACGGGCGTTGAAATTTGATTATATCAGC<br>GTATGCGTTGCGTCTTTGAAAGTGAAGCGCGTGGGGTTG<br>GCGGGGGTAAACCCCGAGGGATGACGAAGTGGCCTAGCG<br>CCGCTTGTGTTCTGTATCAAGACTGGAGAACGTTT                                                                                                                                       | 202                 | +89 -112                  | intragenic                              | 215,346.90 ± 10,064.55                                    | 149,722.90 ± 28,683.55 | 117,963.00 ± 12,001.70 | 177,739.8 ± 3,106.58                                  | 475,593.90 ± 98,326.13 | 112,870.50 ± 5,441.33 |
| <i>P(mamE)</i>             | GTTTCGCCAATCCACCACCTCGGTGGGAGAAATATCGGC<br>ACCGCGTTATCGTCCGCAATGACGGCTTCATCGTCAACAA<br>TTACCATGTGTTGCGCGGGCCAAATCGGTGTACGTCAACCG<br>TAAAGGACGAGGAGATCAG                                                                                                                                                                                                    | 142                 | +97 -44                   | intragenic                              | 6,620.39 ± 1,565.49                                       | 7,712.31 ± 3,187.51    | 4,920.84 ± 677.12      | 10,114.83 ± 314.56                                    | 9,124.04 ± 1,787.45    | 7,703.09 ± 225.05     |
| <i>P(mamL1)</i>            | ATGGGGGATGTCATTTTGGTTGGCGAAGATGCGTGGCTGTC<br>CAGGACATGGTATGTAAGAGTATCGGATCGTTGGTGTTC<br>GGCGGCTTGTCTGCTGCTGGCATCGTCCAACGCCATAT                                                                                                                                                                                                                             | 119                 | +70 -48                   | intragenic                              | ND                                                        | ND                     | ND                     | 22,164.34 ± 3,965.70                                  | 11,467.95 ± 408.12     | 14,942.13 ± 1,032.91  |
| <i>P(mamL2)</i>            | TCGTTGGTGTTCGCGGCTTATGCTGCTGCTGCGATCGTC<br>CAACGCCATATGTTGAAACCCGATTTGGCCACTGATAA<br>TCTTTGCGCCACATTTCTGTGTTCTTGGCATTAGTTTTTCT<br>TGGTTTCGCCATTGGGATTTGGTGGTTTGGCAATGTTAT<br>GAAACGGCGCAAGCATA                                                                                                                                                             | 184                 | +161 -22                  | intragenic                              | 6,290.25 ± 355.17                                         | 5,535.89 ± 83.24       | 6,144.78 ± 157.91      | ND                                                    | ND                     | ND                    |
| <i>P(mamL1)+P(mamL2)**</i> | ATGGGGGATGTCATTTTGGTTGGCGAAGATGCGTGGCTGTC<br>CAGGACATGGTATGTAAGAGTATCGGATCGTTGGTGTTC<br>GGCGGCTTGTCTGCTGCTGGCATCGTCCAACGCCATAT<br>GGTGAAACCCGATTTGGCCACTGATAATGTTGCCAC<br>ATTTCTGGTCTTGGCAATTAGCTTTTTCTTGGTTTCCGCAT<br>TGGGATTGTTGGTGTTCGGAATGTTGAAACCCGCCAA<br>GCATAAATGCTTGGGAAACATGTCATTAAGCCGTGACA<br>TTCCATGCTCGTGGGAGCTGGCCGGGGCTTTGGAGTAGG<br>TAAGG | 338                 | +70 -267; +232 -105       | intragenic                              | 12,479.97 ± 1,469.04                                      | 13,228.65 ± 251.33     | 14,061.37 ± 419.79     | ND                                                    | ND                     | ND                    |
| <i>P(mamO)</i>             | CGGATCAGTCTGCAGAAGCCATTGCCAACAGTTCCGTCTCT<br>GGTGTCTGGCCTCCGTCGCGGTTCAAGTGTAGCCTTTA<br>TTCATGCGCGCAGCACCGGTCTTATTCATTGGAGCTCCG<br>GTAACATTGGCCTGCTGATGATCCAGGTGCTTATGTTGGC<br>GGCATTCTCGGCTCGTGTGATGCGGGTGTTCCTGTCGG<br>GGTGTCTAAGGTATCTATGCGCAACCATGCGCCTATCG<br>CCATCAAGATGCTGACAACCGTGTGATGATAGTTTGGG<br>ATTAGCCGGGA                                    | 300                 | +231 -68                  | intragenic                              | 2,156.629 ± 1,099.40                                      | 2,735.47 ± 1,751.12    | 2,469.75 ± 473.44      | 55,643.88 ± 1,455.33                                  | 39,911.96 ± 5,745.28   | 35,344.63 ± 3,490.30  |
| <i>P(mamP)</i>             | GCACCCGGTCTTGCGAAACTGACCGTGGTTTTGCGCGCG<br>GCCAAGGCGGTTTGGGCTTTGCCAGTTGGAAGGCGCCC<br>CCATGATCCTTCGGGCGATCCTCGGCCCATGGATATCGC<br>GGCGCTGCACCGATTGCCATCCGGTAGGCCAGGGATTG<br>AATTGTCGCGCGATCCTGATCTCATCAGCCTGCGGCTCG<br>GCCATAACGCGTATGCGGTTACCGGGGGCTCAGTCCCA<br>CGAAGTTCTGGCCCGTGGAAAGCTTGCCACGTGATAAAT<br>AGCCAGAGCCACCGATTGGGATT                          | 310                 | +290 -19                  | intragenic                              | 15,400.23 ± 584.39                                        | 16,425.34 ± 736.31     | 15,700.55 ± 413.48     | 27,361.36 ± 1,422.60                                  | 23,292.31 ± 2,802.12   | 26,600.00 ± 2,286.92  |
| <i>P(mamA)</i>             | GTGATAAATTAGCCAGAGCCACCGATTGGGATTTGGAGA<br>ACAGTATGTCTAGCAAGCCGTCGAATATGCTTGATGAAGTTA<br>CCCTGTATACTACTACGGCTATCCGTGGCAAGAAGCTC<br>GGTGCGAATAGGAGATCAG                                                                                                                                                                                                     | 143                 | +101 -41                  | intragenic                              | ND                                                        | ND                     | ND                     | 6,448.73 ± 286.87                                     | 6,874.21 ± 716.73      | 5,741.43 ± 297.54     |
| <i>P(mamQ)</i>             | ATGATGACCTCGTGGTGGATGGAAGACCGGATGCCAG<br>CAAGAGGGAGGAAATTAACGCATCTGCCCGACCTATAATG<br>TGGCAATCACCAAGTGGCGTGGGATTATCGGCAATGATC<br>ACCGGGTTAAGCGCGTGGAGATTTCACAGAAAAGCCTGC<br>AGGCGACACCGCGATCAIT                                                                                                                                                             | 183                 | +118 -64                  | intragenic                              | 20,086.64 ± 1,335.57                                      | 16,833.18 ± 868.32     | 19,678.62 ± 218.76     | 38,493.87 ± 7,446.63                                  | 39,468.19 ± 890.16     | 45,952.15 ± 2,931.38  |

|                |                                                                                                                                                                                                                                                                                                                                                                                                                                                                                                     |     |           |                        |                           |                           |                          |                          |                     |                          |
|----------------|-----------------------------------------------------------------------------------------------------------------------------------------------------------------------------------------------------------------------------------------------------------------------------------------------------------------------------------------------------------------------------------------------------------------------------------------------------------------------------------------------------|-----|-----------|------------------------|---------------------------|---------------------------|--------------------------|--------------------------|---------------------|--------------------------|
| <i>PmamG*</i>  | CAACTTTTCGCTTTACTAGCTCTAGTTCTCCAATAAATTCCTGCGTCGATTTAAGGGGCAGAGAGGGAATCGTGCATACA<br>CTTGCCGGAGATCAG                                                                                                                                                                                                                                                                                                                                                                                                 | 99  | +48 -50   | primary                | 325,856.80 ±<br>13,377.86 | 184,087.10 ±<br>95,993.28 | 131,925.3 ±<br>40,384.65 | ND                       | ND                  | ND                       |
| <i>Pmms6*</i>  | ACCTGTCAATTCCTCCCTGGTGCATCGTGCAGCCATGCTG<br>GCCAAACAGGGTGTCTTCTCAGCGTGGCAGATTTCTGTGG<br>GGAGGTTTAAAGTGGTGGTGGTCAATGGCGTTAAGGGATCG<br>TCCCGTGTCTACTCTTTGGGATTTGTGCACAATTTATGGGCTT<br>GTGGTTTTGGCGGGAGCTGCGGTGCTTCGCTGTGCCACAA<br>GAACCCGCGACAGCGGGCCGGGTGCAACAGGGGCTGCTGT<br>CAAAACCCGCGCAGAGGCAATGCGAATAACCCGCGAGTAG<br>CGGGGGCGGTGCAGATAAATAATCGCTCGTAACCTCCATGTA<br>ATAGTGTTTTTAGCCCCATACAGGTTGTCTATTTCGGCAAC<br>CTCATGGATTGAATTGATGTCTGGTGAGGCTGATTTTTTC<br>AGTCCCGCACTACTTGTATTGCTAAGGAGAACTCTG | 450 | +394 -55  | primary                | 66,616.58 ± 5,149.73      | 35,956.18 ± 1,323.88      | 41,808.58 ±<br>1,777.31  | ND                       | ND                  | ND                       |
| <i>Pmms36</i>  | GGTTCGGCCTCGGGTATTTACGTCTGATGCCCGGCTGTGC<br>AGGGCATCAGCTGTTTCAGGACCGTTTCATCTATAATTAAT<br>GTCTTGCCAAAGGATCGGTGATCGTGAAATCGCCGTTCG<br>GGGGCGGTTGGGCCCGGTTGACAGCCGCGCAGCTAGCGGA<br>AGCGGAGCCA                                                                                                                                                                                                                                                                                                          | 175 | +124 -50  | primary, within operon | 29,347.87 ± 2,524.35      | 36,089.24 ± 2,088.05      | 34,664.94 ±<br>5,600.79  | ND                       | ND                  | ND                       |
| <i>PmamY</i>   | GGCAGCCTCAITTAACATTACAGGACGCGCTGCCATATTATA<br>CTATTCCGAAATTAATACTTAGCACCTTTCCCAACGGACT<br>CTTAGGCAATGCAGTCTCACAACAAAGGCGGTGTTCG<br>GATTAATGCGCATCTTCCGGATTGACGGACTCGCCACAAG<br>CCATATCTATCCCTTGTGTCCAAGTACCCTTCCCGGTGAGCT<br>TGCTGTACTGTGGCAGTATCCTATACACACCAGAACATTTT<br>GGGACCCACAGCCACCCAGGGAGCAGCCCTT                                                                                                                                                                                           | 285 | +228 -56  | primary                | 69,670.43 ± 7,322.48      | 88,076.17 ± 6,500.96      | 75,163.23 ±<br>18,715.86 | ND                       | ND                  | ND                       |
| <i>PmamX</i>   | CGAAAGCCGACGTCGAAATTGCATGGCCGCATTTCCAGC<br>TACGGTCCAGACGGAAGCCGATGGTCATTCCATTGCGTAT<br>GGGAATATGAGATACTCGGCATTTTCATCGCTAGCGCATCG<br>GGAATCGGTAGCTCCACTTTGACCCAGTCCGAACTCCCGTG<br>AACACCAAGCCGTTGCACATCCCGACATCGCCGCTCGGAT<br>C                                                                                                                                                                                                                                                                      | 207 | +104 -102 | primary, within operon | 2,886.03 ± 567.15         | 2,603.45 ± 620.14         | 2,606.91 ± 1,105.23      | 174,463.30 ±<br>9,932.38 | 337,600.00 ± 14,245 | 243,683.9 ±<br>16,751.86 |
| <i>PfeoAB1</i> | GTGCCGAGGGAAAACATCTGCTTGCATCGCCATCGCAAGTTGG<br>CTGAATGACCTTTGTGATGCGACTTGCCGGGTGGCCCAACA<br>TTGATTTTGGCCCTTGAATCGGCAAGATTGAGGGAAG<br>ATGCGCTGAATTAATCGCAACTATTCCGAATTGCTTTGATT<br>ATTGCGGATTAACAATAAGGAGGAGTTCCAGG                                                                                                                                                                                                                                                                                  | 200 | +130 -69  | primary                | 143,000.80 ±<br>3,876.68  | 100,592.90 ±<br>12,752.28 | 118,859.00 ±<br>4,329.75 | ND                       | ND                  | ND                       |
| P-less Control | GAAGAAGCTCGGTGCGACTAGGAGATCAG                                                                                                                                                                                                                                                                                                                                                                                                                                                                       | 29  | -         | -                      | ND                        | ND                        | ND                       | 2,648.16 ± 465.76        | 2,141.53 ± 162.66   | 3,213.64 ± 496.32        |

\* previously reported promoter containing regions (Schübbe et al., 2006)

\*\* Comprises the putative promoters corresponding to both TSS found within gene mamL, P(mamL1) and P(mamL2)
