# Supplementary material for: The Complex Transcriptional Landscape of Magnetosome Gene Clusters in Magnetospirillum gryphiswaldense
Source: PubMed Central journal article supplement (PMC8547445; doi:10.1128/msystems.00893-21), 2021-09-14
Supplement: msystems.00893-21-st004.pdf [file msystems.00893-21-st004.pdf]

**Table S4 Native RBS predicted within MagOPs that were used for the promoter evaluation**

| RBS sequence | String | Start position | Distance to start codon, bp | Protein* |
|--------------|--------|----------------|-----------------------------|----------|
| AGGAGA       | -      | 308,344        | 6                           | Mms6     |
| CGGAAG       | -      | 307,396        | 8                           | Mms36    |
| CGGAGA       | +      | 308,979        | 4                           | MamG     |
| TGGAGG       | +      | 321,361        | 6                           | MamH     |
| TGGAGA       | +      | 322,694        | 6                           | MamI     |
| TGGAGC       | +      | 325,237        | 6                           | MamJ     |
| TGGAGT       | +      | 327,940        | 7                           | MamM     |
| TGGAGA       | +      | 333,027        | 5                           | MamA     |
| AGGAAT       | +      | 334,544        | 9                           | MamR     |
| GGGAGC       | -      | 370,963        | 7                           | MamY     |
| AGGAGGAG     | +      | 269,907        | 7                           | FeoA1    |

\* Indicates the protein which translation is controlled by an RBS
