# Supplementary material for: The Complex Transcriptional Landscape of Magnetosome Gene Clusters in Magnetospirillum gryphiswaldense
Source: PubMed Central journal article supplement (PMC8547445; doi:10.1128/msystems.00893-21), 2021-09-14
Supplement: reviewer-comments.pdf [file reviewer-comments.pdf]

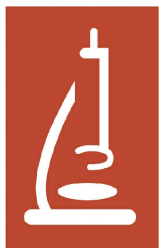

AMERICAN  
SOCIETY FOR  
MICROBIOLOGY

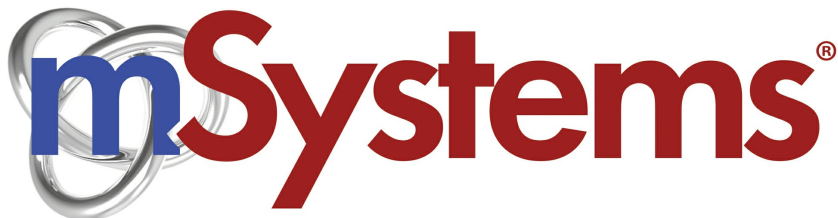

# The Complex Transcriptional Landscape of Magnetosome Gene Clusters in *Magnetospirillum gryphiswaldense*

Marina Dziuba, Cornelius Riese, Lion Borgert, Manuel Wittchen, Tobias Busche, Jörn Kalinowski, René Uebe, and Dirk Schüler

*Corresponding Author(s): Dirk Schüler, University of Bayreuth*

---

## Review Timeline:

Submission Date:

July 14, 2021

Accepted:

August 11, 2021

---

*Editor: Caroline Ajo-Franklin*

*Reviewer(s): The reviewers have opted to remain anonymous.*

## Transaction Report:

(Note: With the exception of the correction of typographical or spelling errors that could be a source of ambiguity, letters and reports are not edited. The original formatting of letters and referee reports may not be reflected in this compilation.)

**DOI: <https://doi.org/10.1128/mSystems.00893-21>**

August 11, 2021

Prof. Dirk Schüler  
University of Bayreuth  
Microbiology  
Bayreuth  
Germany

Re: mSystems00893-21 (The Complex Transcriptional Landscape of Magnetosome Gene Clusters in *Magnetospirillum gryphiswaldense*)

Dear Prof. Dirk Schüler:

Your manuscript has been accepted, and I am forwarding it to the ASM Journals Department for publication. For your reference, ASM Journals' address is given below. Before it can be scheduled for publication, your manuscript will be checked by the mSystems senior production editor, Ellie Ghatineh, to make sure that all elements meet the technical requirements for publication. She will contact you if anything needs to be revised before copyediting and production can begin. Otherwise, you will be notified when your proofs are ready to be viewed.

As an open-access publication, mSystems receives no financial support from paid subscriptions and depends on authors' prompt payment of publication fees as soon as their articles are accepted. =

**Publication Fees:**

You will be contacted separately about payment when the proofs are issued; please follow the instructions in that e-mail. Arrangements for payment must be made before your article is published. For a complete list of **Publication Fees**, including supplemental material costs, please visit our [website](#).

Corresponding authors may [join or renew ASM membership](#) to obtain discounts on publication fees. Need to upgrade your membership level? Please contact Customer Service at [Service@asmusa.org](mailto:Service@asmusa.org).

**For mSystems research articles**, you are welcome to submit a short author video for your recently accepted paper. Videos are normally 1 minute long and are a great opportunity for junior authors to get greater exposure. Importantly, this video will not hold up the publication of your paper, and you can submit it at any time.

Details of the video are:

- Minimum resolution of 1280 x 720
- .mov or .mp4. video format
- Provide video in the highest quality possible, but do not exceed 1080p
- Provide a still/profile picture that is 640 (w) x 720 (h) max
- Provide the script that was used

We recognize that the video files can become quite large, and so to avoid quality loss ASM suggests sending the video file via <https://www.wetransfer.com/>. When you have a final version of the video and the still ready to share, please send it to Ellie Ghatineh at [eghatineh@asmusa.org](mailto:eghatineh@asmusa.org).

Thank you for submitting your paper to mSystems.

Sincerely,

Caroline Ajo-Franklin  
Editor, mSystems

Journals Department  
American Society for Microbiology  
1752 N St., NW  
Washington, DC 20036  
E-mail: [peerreview@asmusa.org](mailto:peerreview@asmusa.org)  
Phone: 1-202-942-9338

Table S3: Accept  
Fig. S3: Accept  
Table S4: Accept  
Fig. S1: Accept  
Fig. S2: Accept  
Table S1: Accept  
Table S2: Accept  
Fig. S4: Accept
